# Supplementary material for: Tissue Elasticity Regulated Tumor Gene Expression: Implication for Diagnostic Biomarkers of Primitive Neuroectodermal Tumor
Source: PLoS One. 2015 Mar 16;10(3):e0120336. doi: 10.1371/journal.pone.0120336 (PMC4361745; doi:10.1371/journal.pone.0120336)
Supplement: S4 Dataset — Probes differentially regulated (FC > |2|) were compared to a background gene expression to determine enriched terms using DAVID v6.7 software. (XLS) [file pone.0120336.s004.xls]

## Sheet: Sheet1
Table A4. GO cellular component terms enriched by differentially regulated probes. Probes differentially regulated (FC > |2|) were compared to a background gene expression to determine enriched terms using DAVID v6.7 software.
Category	Term	Count	%	PValue	Genes	List Total	Pop Hits	Pop Total	Fold Enrichment	Bonferroni	Benjamini	FDR
GOTERM_CC_FAT	GO:0031981~nuclear lumen	465	11.57	9.94068e-36	214305_S_AT, 212385_AT, 65133_I_AT, 211984_AT, 204847_AT, 228837_AT, 212027_AT, 223947_S_AT, 228190_AT, 213007_AT, 232473_AT, 221919_AT, 235841_AT, 221428_S_AT, 238735_AT, 230291_S_AT, 202095_S_AT, 201643_X_AT, 201071_X_AT, 236404_AT, 218218_AT, 205383_S_AT, 229787_S_AT, 238883_AT, 225452_AT, 219361_S_AT, 227205_AT, 1559218_S_AT, 221606_S_AT, 202303_X_AT, 212563_AT, 212263_AT, 225798_AT, 213837_A…	2456	1450	12782	1.669	7.27658e-33	7.27658e-33	1.50808e-32
GOTERM_CC_FAT	GO:0070013~intracellular organelle lumen	526	13.0878	2.33155e-30	214305_S_AT, 212385_AT, 203159_AT, 65133_I_AT, 211984_AT, 204847_AT, 212027_AT, 228837_AT, 223947_S_AT, 228190_AT, 213007_AT, 232473_AT, 221919_AT, 235841_AT, 221428_S_AT, 238735_AT, 230291_S_AT, 202095_S_AT, 201643_X_AT, 201071_X_AT, 236404_AT, 218218_AT, 205383_S_AT, 229787_S_AT, 238883_AT, 225452_AT, 219361_S_AT, 227205_AT, 1559218_S_AT, 221606_S_AT, 202303_X_AT, 212563_AT, 212263_AT, 225798_A…	2456	1779	12782	1.53879	1.70669e-27	8.53346e-28	3.53715e-27
GOTERM_CC_FAT	GO:0043233~organelle lumen	534	13.2869	6.24039e-30	214305_S_AT, 212385_AT, 203159_AT, 65133_I_AT, 211984_AT, 204847_AT, 212027_AT, 228837_AT, 223947_S_AT, 228190_AT, 213007_AT, 232473_AT, 221919_AT, 235841_AT, 221428_S_AT, 238735_AT, 230291_S_AT, 202095_S_AT, 201643_X_AT, 201071_X_AT, 236404_AT, 218218_AT, 205383_S_AT, 229787_S_AT, 238883_AT, 225452_AT, 219361_S_AT, 227205_AT, 1559218_S_AT, 221606_S_AT, 202303_X_AT, 212563_AT, 212263_AT, 225798_A…	2456	1820	12782	1.527	4.56797e-27	1.52266e-27	9.4672e-27
GOTERM_CC_FAT	GO:0031974~membrane-enclosed lumen	541	13.4611	1.45289e-29	214305_S_AT, 212385_AT, 203159_AT, 65133_I_AT, 211984_AT, 204847_AT, 212027_AT, 228837_AT, 223947_S_AT, 228190_AT, 213007_AT, 232473_AT, 221919_AT, 235841_AT, 221428_S_AT, 238735_AT, 230291_S_AT, 202095_S_AT, 201643_X_AT, 201071_X_AT, 236404_AT, 218218_AT, 205383_S_AT, 229787_S_AT, 238883_AT, 225452_AT, 219361_S_AT, 227205_AT, 1559218_S_AT, 221606_S_AT, 202303_X_AT, 212563_AT, 212263_AT, 225798_A…	2456	1856	12782	1.51701	1.06351e-26	2.65878e-27	2.20415e-26
GOTERM_CC_FAT	GO:0005654~nucleoplasm	290	7.21573	1.12162e-23	213891_S_AT, 214305_S_AT, 212385_AT, 219028_AT, 218036_X_AT, 212455_AT, 207564_X_AT, 203132_AT, 210282_AT, 211984_AT, 225521_AT, 226934_AT, 228837_AT, 212027_AT, 225278_AT, 210269_S_AT, 223947_S_AT, 242868_AT, 213007_AT, 217742_S_AT, 232473_AT, 221919_AT, 212030_AT, 209902_AT, 235841_AT, 222999_S_AT, 221428_S_AT, 238735_AT, 201071_X_AT, 236404_AT, 217550_AT, 218218_AT, 229787_S_AT, 238883_AT, 225…	2456	882	12782	1.7112	8.21025e-21	1.64205e-21	1.70159e-20
GOTERM_CC_FAT	GO:0043228~non-membrane-bounded organelle	681	16.9445	2.09873e-23	65133_I_AT, 211984_AT, 225022_AT, 204847_AT, 228602_AT, 211684_S_AT, 201133_S_AT, 223618_AT, 228190_AT, 213007_AT, 228323_AT, 221919_AT, 244572_AT, 208445_S_AT, 204373_S_AT, 212752_AT, 221428_S_AT, 230291_S_AT, 224958_AT, 202095_S_AT, 201643_X_AT, 201718_S_AT, 1569512_AT, 210694_S_AT, 236388_AT, 236404_AT, 205383_S_AT, 226098_AT, 235432_AT, 212920_AT, 219361_S_AT, 208878_S_AT, 227205_AT, 200911_S…	2456	2596	12782	1.36525	1.53627e-20	2.56045e-21	3.18395e-20
GOTERM_CC_FAT	GO:0043232~intracellular non-membrane-bounded organelle	681	16.9445	2.09873e-23	65133_I_AT, 211984_AT, 225022_AT, 204847_AT, 228602_AT, 211684_S_AT, 201133_S_AT, 223618_AT, 228190_AT, 213007_AT, 228323_AT, 221919_AT, 244572_AT, 208445_S_AT, 204373_S_AT, 212752_AT, 221428_S_AT, 230291_S_AT, 224958_AT, 202095_S_AT, 201643_X_AT, 201718_S_AT, 1569512_AT, 210694_S_AT, 236388_AT, 236404_AT, 205383_S_AT, 226098_AT, 235432_AT, 212920_AT, 219361_S_AT, 208878_S_AT, 227205_AT, 200911_S…	2456	2596	12782	1.36525	1.53627e-20	2.56045e-21	3.18395e-20
GOTERM_CC_FAT	GO:0005730~nucleolus	224	5.57353	5.3292e-17	222607_S_AT, 221556_AT, 233803_S_AT, 218036_X_AT, 65133_I_AT, 204847_AT, 223802_S_AT, 201997_S_AT, 228190_AT, 232135_AT, 221919_AT, 230291_S_AT, 201643_X_AT, 202095_S_AT, 236404_AT, 211603_S_AT, 209290_S_AT, 205383_S_AT, 229519_AT, 214048_AT, 212636_AT, 219361_S_AT, 227205_AT, 213743_AT, 202303_X_AT, 221606_S_AT, 212263_AT, 212563_AT, 213837_AT, 224760_AT, 201773_AT, 235852_AT, 217299_S_AT, 23082…	2456	698	12782	1.67018	3.90097e-14	5.57282e-15	8.08484e-14
GOTERM_CC_FAT	GO:0044451~nucleoplasm part	188	4.67778	5.7415e-17	227376_AT, 213891_S_AT, 219028_AT, 214305_S_AT, 203599_S_AT, 212385_AT, 212332_AT, 212455_AT, 207564_X_AT, 203132_AT, 201085_S_AT, 210282_AT, 225694_AT, 225691_AT, 1555501_S_AT, 226934_AT, 228837_AT, 212027_AT, 210269_S_AT, 225902_AT, 223947_S_AT, 242868_AT, 232473_AT, 225348_AT, 217742_S_AT, 212030_AT, 232333_AT, 235841_AT, 204947_AT, 222999_S_AT, 221428_S_AT, 208994_S_AT, 238735_AT, 1556306_AT,…	2456	555	12782	1.76293	8.12683e-14	1.0103e-14	1.66533e-13
GOTERM_CC_FAT	GO:0015630~microtubule cytoskeleton	178	4.42896	7.46391e-14	235653_S_AT, 242287_AT, 219028_AT, 203162_S_AT, 231895_AT, 227013_AT, 203132_AT, 227105_AT, 227785_AT, 222394_AT, 211984_AT, 1555278_A_AT, 204857_AT, 211684_S_AT, 228190_AT, 215222_X_AT, 235031_AT, 203518_AT, 204373_S_AT, 212752_AT, 221428_S_AT, 210849_S_AT, 202095_S_AT, 217878_S_AT, 225484_AT, 1560926_AT, 210694_S_AT, 209748_AT, 232098_AT, 226098_AT, 212253_X_AT, 235432_AT, 207828_S_AT, 200911_S…	2456	549	12782	1.6874	5.46123e-11	6.06803e-12	1.13187e-10
GOTERM_CC_FAT	GO:0005813~centrosome	91	2.26424	2.06573e-13	219028_AT, 203162_S_AT, 203494_S_AT, 231895_AT, 211864_S_AT, 227013_AT, 227105_AT, 227785_AT, 222394_AT, 218013_X_AT, 211984_AT, 1555278_A_AT, 204857_AT, 214221_AT, 204662_AT, 217437_S_AT, 242558_AT, 202174_S_AT, 212752_AT, 204373_S_AT, 214356_S_AT, 236368_AT, 214937_X_AT, 217878_S_AT, 222151_S_AT, 202095_S_AT, 225484_AT, 210962_S_AT, 1560926_AT, 209748_AT, 201291_S_AT, 204491_AT, 213313_AT, 2251…	2456	224	12782	2.11429	1.5124e-10	1.5124e-11	3.13449e-10
GOTERM_CC_FAT	GO:0005815~microtubule organizing center	98	2.43842	6.99786e-13	219028_AT, 203162_S_AT, 203494_S_AT, 231895_AT, 211864_S_AT, 227013_AT, 227105_AT, 227785_AT, 222394_AT, 218013_X_AT, 211984_AT, 1555278_A_AT, 204857_AT, 214221_AT, 204662_AT, 217437_S_AT, 242558_AT, 202174_S_AT, 204373_S_AT, 212752_AT, 214356_S_AT, 236368_AT, 214937_X_AT, 202095_S_AT, 217878_S_AT, 222151_S_AT, 225484_AT, 210962_S_AT, 1560926_AT, 209748_AT, 226098_AT, 203688_AT, 201291_S_AT, 2044…	2456	253	12782	2.01593	5.12234e-10	4.65668e-11	1.06162e-09
GOTERM_CC_FAT	GO:0005794~Golgi apparatus	252	6.27022	9.01302e-13	235333_AT, 207305_S_AT, 203504_S_AT, 227069_AT, 231832_AT, 212425_AT, 236160_AT, 202604_X_AT, 232530_AT, 237849_AT, 220470_AT, 235985_AT, 213271_S_AT, 225023_AT, 225022_AT, 209060_X_AT, 226094_AT, 201133_S_AT, 226422_AT, 204732_S_AT, 223466_X_AT, 212752_AT, 234988_AT, 213650_AT, 224958_AT, 218306_S_AT, 217922_AT, 242323_AT, 1558249_S_AT, 204324_S_AT, 204426_AT, 218135_AT, 211137_S_AT, 207700_S_AT…	2456	872	12782	1.50402	6.59736e-10	5.4978e-11	1.36732e-09
GOTERM_CC_FAT	GO:0016607~nuclear speck	51	1.26897	1.47037e-11	200754_X_AT, 214305_S_AT, 203599_S_AT, 201085_S_AT, 225694_AT, 225691_AT, 1555501_S_AT, 212027_AT, 211784_S_AT, 219679_S_AT, 210269_S_AT, 222390_AT, 208610_S_AT, 225902_AT, 217742_S_AT, 232473_AT, 225348_AT, 212030_AT, 214988_S_AT, 235841_AT, 232333_AT, 222999_S_AT, 208994_S_AT, 1556306_AT, 201071_X_AT, 1567214_A_AT, 217863_AT, 214659_X_AT, 223236_AT, 212033_AT, 1555411_A_AT, 213153_AT, 241813_AT…	2456	103	12782	2.57693	1.07631e-08	8.2793e-10	2.23067e-08
GOTERM_CC_FAT	GO:0016604~nuclear body	70	1.74173	4.11216e-11	200754_X_AT, 219028_AT, 214305_S_AT, 203599_S_AT, 212455_AT, 203132_AT, 210282_AT, 201085_S_AT, 225694_AT, 1555501_S_AT, 225691_AT, 212027_AT, 226934_AT, 211784_S_AT, 219679_S_AT, 210269_S_AT, 222390_AT, 208610_S_AT, 225902_AT, 217742_S_AT, 232473_AT, 225348_AT, 212030_AT, 214988_S_AT, 235841_AT, 232333_AT, 222999_S_AT, 208994_S_AT, 1556306_AT, 201071_X_AT, 1567214_A_AT, 212126_AT, 214659_X_AT, 2…	2456	168	12782	2.1685	3.01011e-08	2.15008e-09	6.2385e-08
GOTERM_CC_FAT	GO:0005856~cytoskeleton	354	8.80816	4.72812e-10	242287_AT, 219028_AT, 202604_X_AT, 236160_AT, 200729_S_AT, 203132_AT, 225023_AT, 211984_AT, 225022_AT, 228602_AT, 211684_S_AT, 201133_S_AT, 223618_AT, 228190_AT, 215198_S_AT, 203518_AT, 244572_AT, 212752_AT, 204373_S_AT, 221428_S_AT, 202095_S_AT, 1569512_AT, 201718_S_AT, 225484_AT, 210694_S_AT, 1560926_AT, 236388_AT, 209748_AT, 226098_AT, 212253_X_AT, 235432_AT, 236379_AT, 208878_S_AT, 200911_S_A…	2456	1381	12782	1.33407	3.46099e-07	2.30732e-08	7.17296e-07
GOTERM_CC_FAT	GO:0005819~spindle	61	1.51779	1.01882e-09	236620_AT, 203162_S_AT, 209258_S_AT, 228423_AT, 239415_AT, 227013_AT, 203132_AT, 227105_AT, 211984_AT, 204857_AT, 235031_AT, 212752_AT, 204373_S_AT, 221428_S_AT, 217878_S_AT, 202095_S_AT, 222151_S_AT, 210694_S_AT, 235349_AT, 209257_S_AT, 209748_AT, 1554747_A_AT, 207828_S_AT, 235550_AT, 206364_AT, 1555920_AT, 204709_S_AT, 200854_AT, 212672_AT, 227772_AT, 207891_S_AT, 205235_S_AT, 200813_S_AT, 2092…	2456	147	12782	2.15965	7.45777e-07	4.66111e-08	1.54564e-06
GOTERM_CC_FAT	GO:0005829~cytosol	333	8.28564	2.62186e-08	228248_AT, 207564_X_AT, 218520_AT, 211984_AT, 225521_AT, 228548_AT, 205961_S_AT, 225278_AT, 226094_AT, 211684_S_AT, 226441_AT, 228190_AT, 224884_AT, 223307_AT, 223466_X_AT, 212752_AT, 208726_S_AT, 202095_S_AT, 206037_AT, 218306_S_AT, 225484_AT, 235957_AT, 216170_AT, 229787_S_AT, 201335_S_AT, 221211_S_AT, 208878_S_AT, 203253_S_AT, 243296_AT, 206853_S_AT, 216450_X_AT, 244778_X_AT, 203172_AT, 220918…	2456	1330	12782	1.30306	1.91918e-05	1.12894e-06	3.97758e-05
GOTERM_CC_FAT	GO:0012505~endomembrane system	209	5.2003	1.17113e-07	227069_AT, 222824_AT, 219028_AT, 212425_AT, 237849_AT, 213271_S_AT, 241801_AT, 203485_AT, 229506_AT, 204732_S_AT, 223466_X_AT, 221604_S_AT, 217922_AT, 217550_AT, 242037_AT, 204426_AT, 203164_AT, 220576_AT, 239179_AT, 211137_S_AT, 228457_AT, 239851_AT, 223470_AT, 225008_AT, 216450_X_AT, 1555920_AT, 202829_S_AT, 212305_S_AT, 201730_S_AT, 232541_AT, 203293_S_AT, 212006_AT, 234969_S_AT, 210993_S_AT, …	2456	782	12782	1.39095	8.5723e-05	4.76258e-06	0.00017767
GOTERM_CC_FAT	GO:0000151~ubiquitin ligase complex	39	0.970391	4.13756e-07	231913_S_AT, 203533_S_AT, 201879_AT, 210685_S_AT, 225192_AT, 227257_S_AT, 203079_S_AT, 212783_AT, 236062_AT, 239771_AT, 223802_S_AT, 217950_AT, 229436_X_AT, 228045_AT, 238892_AT, 201960_S_AT, 242362_AT, 236994_AT, 209005_AT, 228261_AT, 235224_S_AT, 227545_AT, 203078_AT, 212513_S_AT, 210257_X_AT, 201959_S_AT, 222119_S_AT, 238472_AT, 212638_S_AT, 240971_X_AT, 1559094_AT, 1566509_S_AT, 212991_AT, 15…	2456	90	12782	2.25524	0.000302823	1.59404e-05	0.0006277
GOTERM_CC_FAT	GO:0005694~chromosome	132	3.2844	6.22943e-07	207983_S_AT, 242287_AT, 208025_S_AT, 228999_AT, 212332_AT, 235388_AT, 203132_AT, 204857_AT, 207956_X_AT, 225026_AT, 230165_AT, 213007_AT, 212569_AT, 228323_AT, 240554_AT, 209902_AT, 239163_AT, 208445_S_AT, 212752_AT, 214047_S_AT, 202095_S_AT, 212126_AT, 201565_S_AT, 214048_AT, 212920_AT, 207828_S_AT, 202127_AT, 202616_S_AT, 210716_S_AT, 208860_S_AT, 202303_X_AT, 1555920_AT, 221606_S_AT, 202076_AT…	2456	460	12782	1.49344	0.00045589	2.27995e-05	0.000945052
GOTERM_CC_FAT	GO:0044431~Golgi apparatus part	92	2.28913	7.46356e-07	207305_S_AT, 227069_AT, 212425_AT, 241775_AT, 202604_X_AT, 232530_AT, 237849_AT, 213271_S_AT, 225769_AT, 225023_AT, 1556228_A_AT, 225022_AT, 242975_S_AT, 229648_AT, 1554930_A_AT, 204732_S_AT, 218918_AT, 203759_AT, 209865_AT, 214356_S_AT, 234988_AT, 222235_S_AT, 236368_AT, 203044_AT, 210849_S_AT, 235103_AT, 213102_AT, 229584_AT, 201832_S_AT, 217922_AT, 203446_S_AT, 209976_S_AT, 226395_AT, 223450_S…	2456	294	12782	1.62859	0.000546183	2.60155e-05	0.00113228
GOTERM_CC_FAT	GO:0000793~condensed chromosome	49	1.21921	1.24452e-06	203050_AT, 209258_S_AT, 204240_S_AT, 224734_AT, 227766_AT, 204857_AT, 213336_AT, 201664_AT, 204739_AT, 230165_AT, 228323_AT, 212309_AT, 212125_AT, 208445_S_AT, 212752_AT, 213859_X_AT, 222606_AT, 212127_AT, 201663_S_AT, 218349_S_AT, 219555_S_AT, 214766_S_AT, 209257_S_AT, 226840_AT, 230194_AT, 218768_AT, 238075_AT, 235425_AT, 213140_S_AT, 209172_S_AT, 207828_S_AT, 235423_AT, 211615_S_AT, 1555920_AT…	2456	129	12782	1.97686	0.000910577	4.14078e-05	0.00188803
GOTERM_CC_FAT	GO:0031252~cell leading edge	51	1.26897	1.87486e-06	232530_AT, 202677_AT, 212985_AT, 213194_AT, 222434_AT, 218368_S_AT, 207821_S_AT, 225098_AT, 223324_S_AT, 242975_S_AT, 231111_AT, 242558_AT, 237884_X_AT, 203215_S_AT, 213102_AT, 238563_AT, 205809_S_AT, 208407_S_AT, 1553678_A_AT, 224813_AT, 224848_AT, 204527_AT, 203038_AT, 214464_AT, 1553530_A_AT, 224788_AT, 228173_AT, 239170_AT, 212397_AT, 239121_AT, 219387_AT, 204369_AT, 241966_AT, 1565886_AT, 21…	2456	138	12782	1.92336	0.00137146	5.96679e-05	0.00284429
GOTERM_CC_FAT	GO:0044430~cytoskeletal part	240	5.97163	1.92547e-06	242287_AT, 219028_AT, 202604_X_AT, 200729_S_AT, 203132_AT, 225023_AT, 211984_AT, 225022_AT, 211684_S_AT, 228190_AT, 201133_S_AT, 215198_S_AT, 204373_S_AT, 212752_AT, 221428_S_AT, 202095_S_AT, 201718_S_AT, 1569512_AT, 225484_AT, 236388_AT, 1560926_AT, 210694_S_AT, 209748_AT, 226098_AT, 235432_AT, 236379_AT, 200911_S_AT, 210716_S_AT, 1555920_AT, 223455_AT, 212672_AT, 1554690_A_AT, 213959_S_AT, 2229…	2456	952	12782	1.31203	0.00140845	5.87251e-05	0.00292105
GOTERM_CC_FAT	GO:0005635~nuclear envelope	67	1.66708	5.70606e-06	219028_AT, 212635_AT, 202057_AT, 211864_S_AT, 201711_X_AT, 201731_S_AT, 204857_AT, 200993_AT, 203215_S_AT, 217550_AT, 210766_S_AT, 228012_AT, 212126_AT, 203769_S_AT, 212007_AT, 218768_AT, 210676_X_AT, 227117_AT, 207828_S_AT, 204273_AT, 225115_AT, 226085_AT, 201112_S_AT, 229317_AT, 221829_S_AT, 1555920_AT, 209308_S_AT, 202055_AT, 201730_S_AT, 228568_AT, 235927_AT, 201712_S_AT, 205433_AT, 208775_AT…	2456	205	12782	1.70095	0.00416814	0.00016706	0.00865622
GOTERM_CC_FAT	GO:0044427~chromosomal part	110	2.737	8.2304e-06	242287_AT, 207983_S_AT, 208025_S_AT, 212332_AT, 228999_AT, 235388_AT, 203132_AT, 204857_AT, 207956_X_AT, 225026_AT, 230165_AT, 228323_AT, 209902_AT, 239163_AT, 208445_S_AT, 212752_AT, 202095_S_AT, 214047_S_AT, 212126_AT, 201565_S_AT, 214048_AT, 212920_AT, 207828_S_AT, 202616_S_AT, 210716_S_AT, 208860_S_AT, 1555920_AT, 221606_S_AT, 202076_AT, 213837_AT, 213984_AT, 206500_S_AT, 201730_S_AT, 225041_…	2456	386	12782	1.48312	0.00600657	0.000231692	0.0124855
GOTERM_CC_FAT	GO:0000776~kinetochore	32	0.796218	1.51506e-05	223238_S_AT, 203050_AT, 242287_AT, 1557227_S_AT, 201731_S_AT, 204857_AT, 204739_AT, 228045_AT, 228323_AT, 212309_AT, 212125_AT, 212752_AT, 222606_AT, 212127_AT, 218349_S_AT, 219555_S_AT, 214766_S_AT, 212126_AT, 1558924_S_AT, 218768_AT, 209172_S_AT, 225135_AT, 207828_S_AT, 235423_AT, 226085_AT, 210716_S_AT, 238005_S_AT, 201730_S_AT, 235927_AT, 228709_AT, 212306_AT, 208775_AT, 200813_S_AT, 223907_S…	2456	77	12782	2.16287	0.0110291	0.00041067	0.0229823
GOTERM_CC_FAT	GO:0000775~chromosome, centromeric region	44	1.0948	3.3178e-05	242287_AT, 223238_S_AT, 203050_AT, 1557227_S_AT, 201731_S_AT, 204857_AT, 213336_AT, 230165_AT, 204739_AT, 229758_AT, 228045_AT, 228323_AT, 212309_AT, 212125_AT, 212752_AT, 208445_S_AT, 222606_AT, 202095_S_AT, 212127_AT, 218349_S_AT, 202187_S_AT, 214766_S_AT, 219555_S_AT, 226630_AT, 212126_AT, 235425_AT, 218768_AT, 1558924_S_AT, 209172_S_AT, 213140_S_AT, 225135_AT, 207828_S_AT, 210334_X_AT, 235423…	2456	124	12782	1.84672	0.0239942	0.000867006	0.050322
GOTERM_CC_FAT	GO:0005681~spliceosome	46	1.14456	3.56716e-05	222040_AT, 226975_AT, 212037_AT, 203599_S_AT, 201070_X_AT, 214305_S_AT, 201395_AT, 205292_S_AT, 238781_AT, 201385_AT, 227164_AT, 213483_AT, 227246_AT, 211784_S_AT, 224780_AT, 219679_S_AT, 226591_AT, 210269_S_AT, 222390_AT, 208610_S_AT, 214960_AT, 217742_S_AT, 232473_AT, 208765_S_AT, 221919_AT, 226263_AT, 211929_AT, 234731_AT, 242427_AT, 201742_X_AT, 201224_S_AT, 1567214_A_AT, 201071_X_AT, 200593_…	2456	132	12782	1.81365	0.0257741	0.000900012	0.0541032
GOTERM_CC_FAT	GO:0019898~extrinsic to membrane	130	3.23464	7.83257e-05	241775_AT, 236160_AT, 202516_S_AT, 221965_AT, 225023_AT, 1554346_AT, 225022_AT, 232914_S_AT, 201133_S_AT, 219321_AT, 202379_S_AT, 235031_AT, 213650_AT, 201718_S_AT, 218306_S_AT, 201832_S_AT, 209976_S_AT, 236388_AT, 218218_AT, 238761_AT, 212007_AT, 236379_AT, 230560_AT, 209268_AT, 1557394_AT, 239872_AT, 233849_S_AT, 205841_AT, 1555982_AT, 226049_AT, 228098_S_AT, 215338_S_AT, 214997_AT, 212397_AT, …	2456	494	12782	1.36958	0.0557239	0.0019094	0.118761
GOTERM_CC_FAT	GO:0000779~condensed chromosome, centromeric region	27	0.671809	0.000111199	203050_AT, 212306_AT, 223907_S_AT, 204857_AT, 218741_AT, 230165_AT, 204739_AT, 221685_S_AT, 228323_AT, 225686_AT, 212309_AT, 200037_S_AT, 212125_AT, 212752_AT, 230998_AT, 213151_S_AT, 222606_AT, 202160_AT, 212127_AT, 218349_S_AT, 210821_X_AT, 214766_S_AT, 219555_S_AT, 235425_AT, 218768_AT, 1553535_A_AT, 222566_AT, 209172_S_AT, 213140_S_AT, 206316_S_AT, 207828_S_AT, 204853_AT, 235423_AT, 1555920_A…	2456	66	12782	2.12907	0.078177	0.00262243	0.168565
GOTERM_CC_FAT	GO:0005874~microtubule	79	1.96566	0.000114817	242287_AT, 224614_AT, 201991_S_AT, 214577_AT, 203162_S_AT, 203494_S_AT, 228423_AT, 239415_AT, 227105_AT, 211984_AT, 211684_S_AT, 228680_AT, 235031_AT, 212752_AT, 221428_S_AT, 1558501_AT, 210849_S_AT, 217878_S_AT, 202095_S_AT, 203303_AT, 226395_AT, 210694_S_AT, 235349_AT, 209748_AT, 209234_AT, 235550_AT, 206364_AT, 229417_AT, 210716_S_AT, 228480_AT, 226685_AT, 204709_S_AT, 232837_AT, 201992_S_AT, …	2456	274	12782	1.50054	0.0806157	0.00262315	0.174046
GOTERM_CC_FAT	GO:0030027~lamellipodium	28	0.696691	0.000126164	243012_AT, 209307_AT, 232530_AT, 212985_AT, 222434_AT, 207821_S_AT, 225045_AT, 225098_AT, 209297_AT, 231111_AT, 224694_AT, 242558_AT, 242756_AT, 213102_AT, 238563_AT, 235980_AT, 205809_S_AT, 214782_AT, 228603_AT, 242066_AT, 203329_AT, 208407_S_AT, 201059_AT, 221078_S_AT, 224813_AT, 225186_AT, 228310_AT, 212398_AT, 221752_AT, 215628_X_AT, 212397_AT, 239170_AT, 1555579_S_AT, 239121_AT, 219387_AT, 2…	2456	70	12782	2.08176	0.088221	0.0027948	0.19123
GOTERM_CC_FAT	GO:0015629~actin cytoskeleton	77	1.9159	0.00018122	212254_S_AT, 200729_S_AT, 232058_AT, 218087_S_AT, 242512_AT, 227156_AT, 212122_AT, 208633_S_AT, 211684_S_AT, 229648_AT, 223618_AT, 212663_AT, 215198_S_AT, 215222_X_AT, 204288_S_AT, 201615_X_AT, 203215_S_AT, 244753_AT, 213102_AT, 201718_S_AT, 1569512_AT, 212077_AT, 222457_S_AT, 1559582_AT, 205809_S_AT, 201560_AT, 232098_AT, 201719_S_AT, 202566_S_AT, 204176_AT, 203688_AT, 212253_X_AT, 236718_AT, 23…	2456	269	12782	1.48973	0.124241	0.0038943	0.274573
GOTERM_CC_FAT	GO:0000922~spindle pole	17	0.422991	0.000210429	203162_S_AT, 209258_S_AT, 204444_AT, 227013_AT, 213266_AT, 214251_S_AT, 211984_AT, 227772_AT, 219918_S_AT, 241619_AT, 234984_AT, 209259_S_AT, 227967_AT, 214876_S_AT, 1560116_A_AT, 219242_AT, 221685_S_AT, 223380_S_AT, 211985_S_AT, 222151_S_AT, 209257_S_AT, 209172_S_AT, 206316_S_AT, 207828_S_AT, 202762_AT, 1552417_A_AT, 203690_AT	2456	34	12782	2.6022	0.142771	0.00439176	0.318762
GOTERM_CC_FAT	GO:0005876~spindle microtubule	15	0.373227	0.000375419	209659_S_AT, 200854_AT, 223013_AT, 204444_AT, 212306_AT, 222634_S_AT, 214251_S_AT, 211984_AT, 241619_AT, 200813_S_AT, 200816_S_AT, 221258_S_AT, 222633_AT, 211985_S_AT, 225686_AT, 217880_AT, 212309_AT, 212752_AT, 221428_S_AT, 202095_S_AT, 217878_S_AT, 202717_S_AT, 206316_S_AT, 240314_AT, 210334_X_AT, 209658_AT, 203690_AT, 200857_S_AT, 217881_S_AT	2456	29	12782	2.69193	0.24032	0.00760588	0.568029
GOTERM_CC_FAT	GO:0016363~nuclear matrix	23	0.572282	0.000384129	214363_S_AT, 201459_AT, 204064_AT, 209258_S_AT, 238723_AT, 243259_AT, 205842_S_AT, 235240_AT, 214251_S_AT, 218371_S_AT, 209259_S_AT, 204516_AT, 221768_AT, 225902_AT, 240554_AT, 227680_AT, 1558093_S_AT, 208994_S_AT, 205733_AT, 239710_AT, 201224_S_AT, 214766_S_AT, 1559946_S_AT, 209257_S_AT, 236404_AT, 208993_S_AT, 228012_AT, 203232_S_AT, 209172_S_AT, 201225_S_AT, 203231_S_AT, 207828_S_AT, 200624_S_…	2456	56	12782	2.13752	0.24515	0.00757218	0.581173
GOTERM_CC_FAT	GO:0000139~Golgi membrane	56	1.39338	0.000403132	227069_AT, 237849_AT, 213271_S_AT, 242975_S_AT, 229648_AT, 1554930_A_AT, 204732_S_AT, 218918_AT, 203759_AT, 209865_AT, 222235_S_AT, 203044_AT, 213102_AT, 235103_AT, 201832_S_AT, 217922_AT, 209976_S_AT, 214730_S_AT, 205809_S_AT, 214743_AT, 222689_AT, 227776_AT, 227685_AT, 211137_S_AT, 212900_AT, 224813_AT, 205105_AT, 210942_S_AT, 217939_S_AT, 202829_S_AT, 222719_S_AT, 223278_AT, 31799_AT, 236829_A…	2456	186	12782	1.56692	0.255582	0.00773707	0.609841
GOTERM_CC_FAT	GO:0031090~organelle membrane	254	6.31998	0.000486057	227069_AT, 222824_AT, 219028_AT, 212425_AT, 237849_AT, 213271_S_AT, 235093_AT, 241801_AT, 203485_AT, 229506_AT, 204732_S_AT, 223466_X_AT, 221604_S_AT, 217922_AT, 217550_AT, 218218_AT, 242037_AT, 204426_AT, 203164_AT, 220576_AT, 239179_AT, 211137_S_AT, 228457_AT, 239851_AT, 238554_AT, 223470_AT, 225008_AT, 216450_X_AT, 1555920_AT, 202829_S_AT, 212305_S_AT, 1555982_AT, 232541_AT, 200662_S_AT, 20329…	2456	1096	12782	1.20613	0.299444	0.00908363	0.734855
GOTERM_CC_FAT	GO:0030529~ribonucleoprotein complex	130	3.23464	0.000520901	214305_S_AT, 203599_S_AT, 232058_AT, 235470_AT, 212027_AT, 226934_AT, 224780_AT, 210269_S_AT, 218046_S_AT, 232473_AT, 217742_S_AT, 208765_S_AT, 221919_AT, 212030_AT, 244753_AT, 224958_AT, 201071_X_AT, 223743_S_AT, 229519_AT, 1558142_AT, 202127_AT, 210008_S_AT, 212583_AT, 203172_AT, 213840_S_AT, 212563_AT, 203931_S_AT, 201637_S_AT, 35265_AT, 225932_S_AT, 221547_AT, 235032_AT, 213470_S_AT, 230270_A…	2456	515	12782	1.31373	0.317095	0.00948966	0.787341
GOTERM_CC_FAT	GO:0000777~condensed chromosome kinetochore	23	0.572282	0.000679054	203050_AT, 212306_AT, 204857_AT, 223907_S_AT, 218741_AT, 204739_AT, 221685_S_AT, 228323_AT, 225686_AT, 212309_AT, 212125_AT, 212752_AT, 222606_AT, 213151_S_AT, 202160_AT, 212127_AT, 218349_S_AT, 210821_X_AT, 219555_S_AT, 214766_S_AT, 1553535_A_AT, 218768_AT, 209172_S_AT, 206316_S_AT, 207828_S_AT, 204853_AT, 235423_AT, 226115_AT, 205046_AT, 228177_AT, 209408_AT	2456	58	12782	2.06381	0.391791	0.0120545	1.02524
GOTERM_CC_FAT	GO:0044450~microtubule organizing center part	22	0.5474	0.00106026	222562_S_AT, 203162_S_AT, 214578_S_AT, 231895_AT, 202561_AT, 212026_S_AT, 213266_AT, 207719_X_AT, 234984_AT, 212832_S_AT, 1555278_A_AT, 227967_AT, 214876_S_AT, 204662_AT, 1560116_A_AT, 201292_AT, 202174_S_AT, 213044_AT, 212752_AT, 214937_X_AT, 202095_S_AT, 204886_AT, 210962_S_AT, 221683_S_AT, 201291_S_AT, 210334_X_AT, 238108_AT, 218827_S_AT, 1552417_A_AT, 214118_X_AT, 203690_AT, 212746_S_AT, 2182…	2456	56	12782	2.04458	0.539998	0.0183188	1.59648
GOTERM_CC_FAT	GO:0044440~endosomal part	22	0.5474	0.00137924	212425_AT, 202636_AT, 239329_AT, 218158_S_AT, 232311_AT, 206271_AT, 224900_AT, 229648_AT, 212417_AT, 203123_S_AT, 203656_AT, 212416_AT, 217852_S_AT, 206668_S_AT, 203431_S_AT, 226268_AT, 224961_AT, 226450_AT, 227791_AT, 218218_AT, 212099_AT, 213111_AT, 229572_AT, 203909_AT, 203124_S_AT, 203651_AT, 222538_S_AT, 202829_S_AT, 219297_AT, 224960_AT, 1555982_AT	2456	57	12782	2.00871	0.635891	0.0232215	2.0721
GOTERM_CC_FAT	GO:0010008~endosome membrane	22	0.5474	0.00137924	212425_AT, 202636_AT, 239329_AT, 218158_S_AT, 232311_AT, 206271_AT, 224900_AT, 229648_AT, 212417_AT, 203123_S_AT, 203656_AT, 212416_AT, 217852_S_AT, 206668_S_AT, 203431_S_AT, 226268_AT, 224961_AT, 226450_AT, 227791_AT, 218218_AT, 212099_AT, 213111_AT, 229572_AT, 203909_AT, 203124_S_AT, 203651_AT, 222538_S_AT, 202829_S_AT, 219297_AT, 224960_AT, 1555982_AT	2456	57	12782	2.00871	0.635891	0.0232215	2.0721
GOTERM_CC_FAT	GO:0034399~nuclear periphery	23	0.572282	0.00148071	214363_S_AT, 201459_AT, 204064_AT, 209258_S_AT, 238723_AT, 243259_AT, 205842_S_AT, 235240_AT, 214251_S_AT, 218371_S_AT, 209259_S_AT, 204516_AT, 221768_AT, 225902_AT, 240554_AT, 227680_AT, 1558093_S_AT, 208994_S_AT, 205733_AT, 239710_AT, 201224_S_AT, 214766_S_AT, 1559946_S_AT, 209257_S_AT, 236404_AT, 208993_S_AT, 228012_AT, 203232_S_AT, 209172_S_AT, 201225_S_AT, 203231_S_AT, 207828_S_AT, 200624_S_…	2456	61	12782	1.96231	0.661992	0.0243505	2.22295
GOTERM_CC_FAT	GO:0005768~endosome	83	2.06519	0.00163251	242287_AT, 212425_AT, 232530_AT, 243006_AT, 220470_AT, 224818_AT, 201735_S_AT, 209515_S_AT, 205726_AT, 213405_AT, 229648_AT, 212663_AT, 228024_AT, 227562_AT, 214356_S_AT, 235766_X_AT, 236368_AT, 210849_S_AT, 200784_S_AT, 228261_AT, 209678_S_AT, 203884_S_AT, 209748_AT, 204324_S_AT, 218218_AT, 212099_AT, 203769_S_AT, 232925_AT, 203883_S_AT, 218310_AT, 212804_S_AT, 234998_AT, 209268_AT, 207545_S_AT,…	2456	315	12782	1.37132	0.69759	0.0262271	2.44821
GOTERM_CC_FAT	GO:0005938~cell cortex	44	1.0948	0.00178413	209209_S_AT, 201616_S_AT, 232058_AT, 212026_S_AT, 244457_AT, 208633_S_AT, 229648_AT, 230610_AT, 215198_S_AT, 215222_X_AT, 242558_AT, 212309_AT, 235834_AT, 212752_AT, 201615_X_AT, 203215_S_AT, 244753_AT, 201718_S_AT, 212077_AT, 209678_S_AT, 243813_AT, 222127_S_AT, 201719_S_AT, 214782_AT, 207358_X_AT, 1554747_A_AT, 1569202_X_AT, 242066_AT, 236379_AT, 230389_AT, 201617_X_AT, 202660_AT, 201059_AT, 23…	2456	146	12782	1.56845	0.729411	0.0280164	2.67273
GOTERM_CC_FAT	GO:0005667~transcription factor complex	59	1.46803	0.0017886	213891_S_AT, 212385_AT, 224955_AT, 202133_AT, 212332_AT, 224895_AT, 203132_AT, 228837_AT, 223947_S_AT, 242868_AT, 242558_AT, 204947_AT, 238735_AT, 221727_AT, 231825_X_AT, 202221_S_AT, 203753_AT, 219378_AT, 235925_AT, 213435_AT, 227205_AT, 1559218_S_AT, 238869_AT, 225565_AT, 222146_S_AT, 219158_S_AT, 226157_AT, 205187_AT, 225223_AT, 222604_AT, 1554411_AT, 224894_AT, 212387_AT, 235725_AT, 203693_S_…	2456	210	12782	1.46219	0.730296	0.0274964	2.67934
GOTERM_CC_FAT	GO:0005769~early endosome	29	0.721573	0.0018182	225885_AT, 224818_AT, 239329_AT, 201734_AT, 201735_S_AT, 213405_AT, 205726_AT, 240237_AT, 237864_AT, 212663_AT, 214356_S_AT, 213467_AT, 236368_AT, 210849_S_AT, 230462_AT, 228261_AT, 1560680_AT, 218310_AT, 233559_S_AT, 207545_S_AT, 235625_AT, 224800_AT, 1555982_AT, 225064_AT, 224788_AT, 204840_S_AT, 232311_AT, 227627_AT, 225092_AT, 220038_AT, 226291_AT, 209037_S_AT, 225871_AT, 203123_S_AT, 203223_…	2456	85	12782	1.77562	0.736087	0.0273713	2.72311
GOTERM_CC_FAT	GO:0016605~PML body	15	0.373227	0.00183444	213000_AT, 200754_X_AT, 204698_AT, 204341_AT, 219028_AT, 1556088_AT, 212126_AT, 33304_AT, 203132_AT, 218878_S_AT, 202633_AT, 210282_AT, 225116_AT, 205024_S_AT, 225115_AT, 226085_AT, 212293_AT, 202778_S_AT, 225097_AT, 225368_AT, 210281_S_AT, 205733_AT, 203403_S_AT	2456	33	12782	2.36564	0.739211	0.0270567	2.74711
GOTERM_CC_FAT	GO:0008287~protein serine/threonine phosphatase complex	17	0.422991	0.00187074	1554365_A_AT, 213305_S_AT, 204496_AT, 215505_S_AT, 201408_AT, 227422_AT, 209633_AT, 229027_AT, 233002_AT, 202429_S_AT, 229506_AT, 214083_AT, 236545_AT, 231101_AT, 229322_AT, 228013_AT, 202187_S_AT, 203338_AT, 236388_AT, 202777_AT, 202457_S_AT, 216944_S_AT, 201877_S_AT, 227630_AT, 228457_AT, 241786_AT, 209296_AT, 228070_AT, 209632_AT, 210407_AT, 211323_S_AT, 201409_S_AT, 230734_X_AT, 224692_AT, 22…	2456	40	12782	2.21187	0.746063	0.027041	2.80076
GOTERM_CC_FAT	GO:0030530~heterogeneous nuclear ribonucleoprotein complex	10	0.248818	0.00190533	200593_S_AT, 225107_AT, 222040_AT, 213359_AT, 205292_S_AT, 225932_S_AT, 208990_S_AT, 213470_S_AT, 212454_X_AT, 225310_AT, 201031_S_AT, 236000_S_AT, 229434_AT, 221860_AT, 209068_AT, 208765_S_AT, 221919_AT, 235999_AT, 210110_X_AT, 232004_AT, 207127_S_AT, 241996_AT, 210588_X_AT	2456	17	12782	3.06141	0.752423	0.027002	2.85185
GOTERM_CC_FAT	GO:0042995~cell projection	165	4.1055	0.00206535	227376_AT, 212298_AT, 203162_S_AT, 213437_AT, 200729_S_AT, 232058_AT, 232530_AT, 202677_AT, 212985_AT, 225023_AT, 244457_AT, 225022_AT, 218368_S_AT, 207821_S_AT, 217269_S_AT, 229648_AT, 215198_S_AT, 237884_X_AT, 213939_S_AT, 244753_AT, 200784_S_AT, 1569512_AT, 212077_AT, 205032_AT, 236388_AT, 205809_S_AT, 202566_S_AT, 226098_AT, 208407_S_AT, 216115_AT, 230071_AT, 224813_AT, 224848_AT, 204527_AT, …	2456	697	12782	1.23203	0.77984	0.0286845	3.08788
GOTERM_CC_FAT	GO:0005793~ER-Golgi intermediate compartment	17	0.422991	0.00252858	218801_AT, 221760_AT, 237849_AT, 218257_S_AT, 1558466_AT, 229838_AT, 208958_AT, 203293_S_AT, 222568_AT, 226422_AT, 1558467_A_AT, 201056_AT, 227340_S_AT, 222569_AT, 214356_S_AT, 242263_AT, 224629_AT, 236368_AT, 1558199_AT, 231968_AT, 216483_S_AT, 212352_S_AT, 229958_AT, 214701_S_AT, 204426_AT, 218135_AT, 226989_AT, 201057_S_AT, 235629_AT, 239851_AT, 212427_AT, 240172_AT, 208116_S_AT, 209175_AT, 21…	2456	41	12782	2.15792	0.843276	0.034363	3.7681
GOTERM_CC_FAT	GO:0016585~chromatin remodeling complex	25	0.622045	0.00254453	212152_X_AT, 237333_AT, 223013_AT, 206544_X_AT, 204444_AT, 203132_AT, 222634_S_AT, 203845_AT, 218166_S_AT, 213336_AT, 229885_AT, 208445_S_AT, 221428_S_AT, 213859_X_AT, 225396_AT, 241756_AT, 218218_AT, 212126_AT, 225135_AT, 213435_AT, 202599_S_AT, 226085_AT, 1554153_A_AT, 202303_X_AT, 200857_S_AT, 218917_S_AT, 227679_AT, 238005_S_AT, 224974_AT, 200854_AT, 223818_S_AT, 217707_X_AT, 225181_AT, 21815…	2456	71	12782	1.83253	0.845099	0.0339469	3.79144
GOTERM_CC_FAT	GO:0005643~nuclear pore	27	0.671809	0.00263788	1557227_S_AT, 212635_AT, 202057_AT, 202561_AT, 201111_AT, 201711_X_AT, 201731_S_AT, 242712_X_AT, 204857_AT, 200993_AT, 222523_AT, 227934_AT, 212842_X_AT, 218294_S_AT, 212125_AT, 209226_S_AT, 212127_AT, 214766_S_AT, 209225_X_AT, 210766_S_AT, 210676_X_AT, 218768_AT, 227117_AT, 225528_AT, 201112_S_AT, 202056_AT, 238108_AT, 229317_AT, 202097_AT, 221829_S_AT, 200995_AT, 202055_AT, 226561_AT, 201730_S_…	2456	79	12782	1.77872	0.855356	0.0345435	3.92795
GOTERM_CC_FAT	GO:0000228~nuclear chromosome	47	1.16945	0.00282486	229167_AT, 223238_S_AT, 208900_S_AT, 225120_AT, 237333_AT, 209258_S_AT, 208025_S_AT, 204240_S_AT, 202561_AT, 208861_S_AT, 208859_S_AT, 230165_AT, 204354_AT, 209902_AT, 202905_X_AT, 208393_S_AT, 202095_S_AT, 225396_AT, 209257_S_AT, 212126_AT, 226840_AT, 235425_AT, 230194_AT, 238075_AT, 201291_S_AT, 213140_S_AT, 225135_AT, 210334_X_AT, 235423_AT, 211615_S_AT, 238108_AT, 226085_AT, 213301_X_AT, 2088…	2456	162	12782	1.50992	0.873905	0.0363019	4.20083
GOTERM_CC_FAT	GO:0005913~cell-cell adherens junction	15	0.373227	0.00354253	214925_S_AT, 1555579_S_AT, 218087_S_AT, 241970_AT, 244476_AT, 243184_AT, 1554411_AT, 203015_S_AT, 225112_AT, 225098_AT, 203018_S_AT, 202011_AT, 200931_S_AT, 203017_S_AT, 203526_S_AT, 204967_AT, 242558_AT, 242722_AT, 203019_X_AT, 214168_S_AT, 212556_AT, 203329_AT, 203016_S_AT, 206825_AT, 201667_AT, 1555578_AT, 203525_S_AT	2456	35	12782	2.23046	0.925558	0.0445514	5.24149
GOTERM_CC_FAT	GO:0031975~envelope	147	3.65763	0.00390583	219028_AT, 217317_S_AT, 207622_S_AT, 222269_AT, 201919_AT, 204857_AT, 200993_AT, 205032_AT, 211801_X_AT, 217550_AT, 210766_S_AT, 212126_AT, 203769_S_AT, 212007_AT, 207828_S_AT, 238554_AT, 221829_S_AT, 1555920_AT, 242645_AT, 201730_S_AT, 217368_AT, 201712_S_AT, 205433_AT, 200662_S_AT, 202761_S_AT, 212006_AT, 234969_S_AT, 227314_AT, 210993_S_AT, 218708_AT, 218275_AT, 225862_AT, 200037_S_AT, 200994_…	2456	622	12782	1.22998	0.942998	0.0481909	5.76426
GOTERM_CC_FAT	GO:0031967~organelle envelope	146	3.63274	0.00461776	219028_AT, 217317_S_AT, 207622_S_AT, 222269_AT, 201919_AT, 204857_AT, 200993_AT, 211801_X_AT, 217550_AT, 210766_S_AT, 212126_AT, 203769_S_AT, 212007_AT, 207828_S_AT, 238554_AT, 221829_S_AT, 1555920_AT, 242645_AT, 201730_S_AT, 217368_AT, 201712_S_AT, 205433_AT, 200662_S_AT, 202761_S_AT, 212006_AT, 234969_S_AT, 210993_S_AT, 218708_AT, 218275_AT, 225862_AT, 200037_S_AT, 200994_AT, 213282_AT, 243031_…	2456	620	12782	1.22555	0.966225	0.0558065	6.78089
GOTERM_CC_FAT	GO:0046930~pore complex	30	0.746454	0.00534337	1557227_S_AT, 212635_AT, 202057_AT, 202561_AT, 201111_AT, 201711_X_AT, 201731_S_AT, 242712_X_AT, 204857_AT, 200993_AT, 202264_S_AT, 222523_AT, 227934_AT, 212842_X_AT, 218294_S_AT, 212125_AT, 209226_S_AT, 212127_AT, 214766_S_AT, 209225_X_AT, 210766_S_AT, 210676_X_AT, 218768_AT, 227117_AT, 225528_AT, 205568_AT, 201112_S_AT, 202056_AT, 238108_AT, 229317_AT, 203728_AT, 221829_S_AT, 202097_AT, 200995_…	2456	95	12782	1.64349	0.980195	0.0632735	7.80652
GOTERM_CC_FAT	GO:0005912~adherens junction	44	1.0948	0.00598563	229221_AT, 209209_S_AT, 218087_S_AT, 223422_S_AT, 244476_AT, 243184_AT, 227766_AT, 222434_AT, 207821_S_AT, 203018_S_AT, 225098_AT, 202720_AT, 202011_AT, 235264_AT, 203017_S_AT, 202085_AT, 242558_AT, 224685_AT, 232136_S_AT, 203019_X_AT, 205032_AT, 222457_S_AT, 214168_S_AT, 203329_AT, 203016_S_AT, 1553678_A_AT, 203038_AT, 228310_AT, 213532_AT, 225548_AT, 1553530_A_AT, 37966_AT, 214925_S_AT, 217523_…	2456	155	12782	1.47738	0.987657	0.0695095	8.70552
GOTERM_CC_FAT	GO:0005875~microtubule associated complex	31	0.771336	0.00833228	224614_AT, 218602_S_AT, 201991_S_AT, 203162_S_AT, 214577_AT, 212233_AT, 242363_AT, 204444_AT, 233655_S_AT, 211684_S_AT, 228190_AT, 203261_AT, 202095_S_AT, 211928_AT, 203303_AT, 210694_S_AT, 222685_AT, 209234_AT, 225878_AT, 235432_AT, 210334_X_AT, 213313_AT, 242143_AT, 244474_AT, 225573_AT, 213334_X_AT, 204709_S_AT, 203130_S_AT, 201992_S_AT, 229115_AT, 220725_X_AT, 202582_S_AT, 207891_S_AT, 200813…	2456	102	12782	1.58173	0.997812	0.0940642	11.9211
GOTERM_CC_FAT	GO:0005802~trans-Golgi network	17	0.422991	0.00928809	228174_AT, 201943_S_AT, 228173_AT, 212425_AT, 214997_AT, 231086_AT, 201941_AT, 236375_AT, 212255_S_AT, 242975_S_AT, 212417_AT, 222518_AT, 202508_S_AT, 229274_AT, 201567_S_AT, 201940_AT, 203123_S_AT, 214356_S_AT, 201942_S_AT, 236368_AT, 226439_S_AT, 212416_AT, 212043_AT, 229584_AT, 206668_S_AT, 215203_AT, 217904_S_AT, 203124_S_AT, 238589_S_AT, 211137_S_AT, 234998_AT, 212427_AT, 230387_AT, 203384_S…	2456	46	12782	1.92336	0.99892	0.102752	13.2003
GOTERM_CC_FAT	GO:0070161~anchoring junction	47	1.16945	0.00941122	229221_AT, 212037_AT, 209209_S_AT, 218087_S_AT, 223422_S_AT, 244476_AT, 243184_AT, 227766_AT, 222434_AT, 207821_S_AT, 203018_S_AT, 225098_AT, 202011_AT, 202720_AT, 235264_AT, 203017_S_AT, 202085_AT, 242558_AT, 224685_AT, 1567214_A_AT, 232136_S_AT, 203019_X_AT, 222457_S_AT, 205032_AT, 214168_S_AT, 203329_AT, 203016_S_AT, 1553678_A_AT, 203038_AT, 228310_AT, 213532_AT, 225548_AT, 1553530_A_AT, 37966…	2456	172	12782	1.42213	0.999014	0.102508	13.3638
GOTERM_CC_FAT	GO:0000785~chromatin	53	1.31874	0.010806	207983_S_AT, 209258_S_AT, 228999_AT, 212332_AT, 208025_S_AT, 243964_AT, 235388_AT, 203132_AT, 207956_X_AT, 225026_AT, 221582_AT, 1554251_AT, 239163_AT, 209902_AT, 208445_S_AT, 214047_S_AT, 209257_S_AT, 239654_AT, 212126_AT, 201565_S_AT, 214048_AT, 207828_S_AT, 212920_AT, 226085_AT, 225565_AT, 213301_X_AT, 202616_S_AT, 208860_S_AT, 221606_S_AT, 1555920_AT, 202076_AT, 213837_AT, 213984_AT, 224974_A…	2456	200	12782	1.37917	0.999648	0.115165	15.196
GOTERM_CC_FAT	GO:0034708~methyltransferase complex	10	0.248818	0.011011	212126_AT, 226100_AT, 207564_X_AT, 228243_AT, 229787_S_AT, 212080_AT, 203358_S_AT, 201408_AT, 208979_AT, 207563_S_AT, 212307_S_AT, 212825_AT, 226085_AT, 223189_X_AT, 200726_AT, 201409_S_AT, 215006_AT, 212078_S_AT, 209240_AT, 212287_AT, 223190_S_AT, 226981_AT, 1556306_AT	2456	21	12782	2.47828	0.999698	0.115559	15.4623
GOTERM_CC_FAT	GO:0035097~histone methyltransferase complex	10	0.248818	0.011011	212126_AT, 226100_AT, 207564_X_AT, 228243_AT, 229787_S_AT, 212080_AT, 203358_S_AT, 201408_AT, 208979_AT, 207563_S_AT, 212307_S_AT, 212825_AT, 226085_AT, 223189_X_AT, 200726_AT, 201409_S_AT, 215006_AT, 212078_S_AT, 209240_AT, 212287_AT, 223190_S_AT, 226981_AT, 1556306_AT	2456	21	12782	2.47828	0.999698	0.115559	15.4623
GOTERM_CC_FAT	GO:0005798~Golgi-associated vesicle	18	0.447873	0.0118612	31799_AT, 202604_X_AT, 241775_AT, 228164_AT, 225023_AT, 225022_AT, 236862_AT, 64418_AT, 239175_AT, 213500_AT, 201359_AT, 222472_AT, 225871_AT, 228415_AT, 201392_S_AT, 214895_S_AT, 210849_S_AT, 212043_AT, 203446_S_AT, 232981_S_AT, 202603_AT, 222715_S_AT, 215548_S_AT, 200614_AT, 227215_AT, 201358_S_AT, 235625_AT, 205198_S_AT, 201667_AT, 217939_S_AT, 221937_AT, 202829_S_AT, 212040_AT	2456	51	12782	1.83685	0.999839	0.122223	16.5581
GOTERM_CC_FAT	GO:0031982~vesicle	153	3.80692	0.0118627	218962_S_AT, 229549_AT, 203504_S_AT, 212425_AT, 241775_AT, 202604_X_AT, 232058_AT, 232530_AT, 222394_AT, 225023_AT, 218079_S_AT, 225022_AT, 226094_AT, 232914_S_AT, 228323_AT, 202161_AT, 202874_S_AT, 226932_AT, 210849_S_AT, 244753_AT, 200784_S_AT, 203446_S_AT, 200599_S_AT, 235957_AT, 229672_AT, 204324_S_AT, 232098_AT, 204426_AT, 239179_AT, 212253_X_AT, 206254_AT, 212900_AT, 239851_AT, 238034_AT, 2…	2456	670	12782	1.18847	0.999839	0.120553	16.5601
GOTERM_CC_FAT	GO:0030117~membrane coat	21	0.522518	0.0119865	31799_AT, 222516_AT, 235852_AT, 232156_AT, 222531_S_AT, 212511_AT, 213413_AT, 232541_AT, 228164_AT, 64418_AT, 239175_AT, 1556416_S_AT, 213500_AT, 225556_AT, 201359_AT, 227461_AT, 222472_AT, 228415_AT, 232405_AT, 224999_AT, 232981_S_AT, 232925_AT, 218139_S_AT, 222715_S_AT, 225771_AT, 200614_AT, 212900_AT, 215209_AT, 201358_S_AT, 201983_S_AT, 215832_X_AT, 200612_S_AT, 215641_AT, 210616_S_AT, 217939…	2456	63	12782	1.7348	0.999853	0.120084	16.7185
GOTERM_CC_FAT	GO:0048475~coated membrane	21	0.522518	0.0119865	31799_AT, 222516_AT, 235852_AT, 232156_AT, 222531_S_AT, 212511_AT, 213413_AT, 232541_AT, 228164_AT, 64418_AT, 239175_AT, 1556416_S_AT, 213500_AT, 225556_AT, 201359_AT, 227461_AT, 222472_AT, 228415_AT, 232405_AT, 224999_AT, 232981_S_AT, 232925_AT, 218139_S_AT, 222715_S_AT, 225771_AT, 200614_AT, 212900_AT, 215209_AT, 201358_S_AT, 201983_S_AT, 215832_X_AT, 200612_S_AT, 215641_AT, 210616_S_AT, 217939…	2456	63	12782	1.7348	0.999853	0.120084	16.7185
GOTERM_CC_FAT	GO:0048471~perinuclear region of cytoplasm	72	1.79149	0.0124849	201991_S_AT, 214577_AT, 231832_AT, 232058_AT, 232530_AT, 210017_AT, 208042_AT, 224818_AT, 204288_S_AT, 1558501_AT, 203215_S_AT, 244753_AT, 201832_S_AT, 200599_S_AT, 201505_AT, 205032_AT, 209748_AT, 239014_AT, 226392_AT, 1554747_A_AT, 222661_AT, 207828_S_AT, 218534_S_AT, 230669_AT, 208878_S_AT, 212900_AT, 237105_AT, 216450_X_AT, 225728_AT, 210616_S_AT, 209308_S_AT, 223310_X_AT, 228480_AT, 238751_A…	2456	288	12782	1.3011	0.999899	0.123114	17.3536
GOTERM_CC_FAT	GO:0005801~cis-Golgi network	9	0.223936	0.012733	207305_S_AT, 226395_AT, 212352_S_AT, 223450_S_AT, 241775_AT, 238228_AT, 204324_S_AT, 213021_AT, 238002_AT, 215548_S_AT, 239851_AT, 226154_AT, 210191_S_AT, 213020_AT, 236192_AT	2456	18	12782	2.6022	0.999916	0.123763	17.668
GOTERM_CC_FAT	GO:0005881~cytoplasmic microtubule	9	0.223936	0.012733	242287_AT, 214961_AT, 1558924_S_AT, 212306_AT, 210334_X_AT, 200813_S_AT, 210612_S_AT, 200816_S_AT, 201975_AT, 210716_S_AT, 203526_S_AT, 212828_AT, 203525_S_AT, 212309_AT, 212752_AT, 209408_AT, 202095_S_AT	2456	18	12782	2.6022	0.999916	0.123763	17.668
GOTERM_CC_FAT	GO:0000781~chromosome, telomeric region	12	0.298582	0.0146138	229167_AT, 222562_S_AT, 236620_AT, 235215_AT, 204021_S_AT, 202561_AT, 217299_S_AT, 238656_AT, 204020_AT, 223907_S_AT, 202906_S_AT, 226821_AT, 203449_S_AT, 204354_AT, 229790_AT, 202905_X_AT, 205733_AT, 208393_S_AT, 214700_X_AT, 204353_S_AT, 238108_AT, 218228_S_AT, 202907_S_AT, 226503_AT, 233152_X_AT	2456	29	12782	2.15354	0.999979	0.139008	20.0157
GOTERM_CC_FAT	GO:0000145~exocyst	6	0.149291	0.0164616	1559038_AT, 212026_S_AT, 222127_S_AT, 225900_AT, 200778_S_AT, 1558041_A_AT, 1554747_A_AT, 239264_AT, 1569202_X_AT, 200015_S_AT	2456	9	12782	3.4696	0.999995	0.153327	22.2612
GOTERM_CC_FAT	GO:0009898~internal side of plasma membrane	77	1.9159	0.018028	232530_AT, 212983_AT, 244476_AT, 201731_S_AT, 207821_S_AT, 202759_S_AT, 212602_AT, 227562_AT, 1568603_AT, 214352_S_AT, 1569512_AT, 204009_S_AT, 214168_S_AT, 202566_S_AT, 1568604_A_AT, 230389_AT, 212598_AT, 224985_AT, 203516_AT, 210616_S_AT, 221830_AT, 1555948_S_AT, 234344_AT, 242907_AT, 223336_S_AT, 37966_AT, 201730_S_AT, 31799_AT, 224787_S_AT, 212397_AT, 1559776_AT, 220983_S_AT, 239121_AT, 21866…	2456	316	12782	1.26816	0.999998	0.164694	24.1183
GOTERM_CC_FAT	GO:0031410~cytoplasmic vesicle	145	3.60786	0.0203217	218962_S_AT, 229549_AT, 203504_S_AT, 212425_AT, 241775_AT, 202604_X_AT, 232058_AT, 222394_AT, 225023_AT, 218079_S_AT, 225022_AT, 226094_AT, 232914_S_AT, 228323_AT, 202161_AT, 202874_S_AT, 226932_AT, 210849_S_AT, 244753_AT, 200784_S_AT, 203446_S_AT, 200599_S_AT, 235957_AT, 229672_AT, 204324_S_AT, 232098_AT, 204426_AT, 239179_AT, 212253_X_AT, 206254_AT, 212900_AT, 239851_AT, 238034_AT, 216450_X_AT,…	2456	642	12782	1.17545	1	0.181582	26.7632
GOTERM_CC_FAT	GO:0031256~leading edge membrane	10	0.248818	0.0212382	210040_AT, 213194_AT, 205746_S_AT, 210612_S_AT, 225491_AT, 203216_S_AT, 1553678_A_AT, 1558714_AT, 224694_AT, 203038_AT, 212828_AT, 238688_AT, 213532_AT, 203215_S_AT, 1553530_A_AT	2456	23	12782	2.26278	1	0.186786	27.7957
GOTERM_CC_FAT	GO:0005581~collagen	13	0.323464	0.0255451	225664_AT, 202311_S_AT, 215446_S_AT, 225293_AT, 213992_AT, 212940_AT, 229218_AT, 212489_AT, 202404_S_AT, 214587_AT, 201852_X_AT, 217312_S_AT, 212488_AT, 212937_S_AT, 226237_AT, 202310_S_AT, 225288_AT, 221730_AT, 221729_AT, 1556499_S_AT, 213110_S_AT, 231879_AT, 204136_AT, 215076_S_AT	2456	35	12782	1.93306	1	0.218078	32.4686
GOTERM_CC_FAT	GO:0016327~apicolateral plasma membrane	29	0.721573	0.0265873	226834_AT, 212037_AT, 218087_S_AT, 226092_AT, 241970_AT, 227422_AT, 244476_AT, 243184_AT, 1554411_AT, 222667_S_AT, 202011_AT, 219321_AT, 203526_S_AT, 202085_AT, 204967_AT, 225968_AT, 242558_AT, 232859_S_AT, 203917_AT, 225474_AT, 1567214_A_AT, 226770_AT, 236388_AT, 236752_AT, 214168_S_AT, 226374_AT, 226447_AT, 203407_AT, 212248_AT, 32402_S_AT, 225817_AT, 213012_AT, 219760_AT, 203987_AT, 232017_AT,…	2456	102	12782	1.47968	1	0.223445	33.556
GOTERM_CC_FAT	GO:0043005~neuron projection	81	2.01543	0.0294239	201991_S_AT, 214577_AT, 212298_AT, 203162_S_AT, 213437_AT, 212985_AT, 231513_AT, 221802_S_AT, 213194_AT, 225023_AT, 244457_AT, 225022_AT, 209515_S_AT, 225098_AT, 213430_AT, 1555938_X_AT, 226191_AT, 229648_AT, 212663_AT, 215198_S_AT, 242558_AT, 201615_X_AT, 1558501_AT, 213939_S_AT, 203215_S_AT, 235766_X_AT, 200784_S_AT, 229584_AT, 212077_AT, 238563_AT, 205032_AT, 236388_AT, 216115_AT, 230071_AT, 2…	2456	342	12782	1.23262	1	0.24174	36.4336
GOTERM_CC_FAT	GO:0031988~membrane-bounded vesicle	128	3.18487	0.0302547	218962_S_AT, 229549_AT, 203504_S_AT, 212425_AT, 241775_AT, 202604_X_AT, 232058_AT, 222394_AT, 225023_AT, 218079_S_AT, 225022_AT, 226094_AT, 232914_S_AT, 202161_AT, 228323_AT, 226932_AT, 210849_S_AT, 244753_AT, 200784_S_AT, 203446_S_AT, 200599_S_AT, 235957_AT, 229672_AT, 204324_S_AT, 232098_AT, 204426_AT, 239179_AT, 212253_X_AT, 206254_AT, 212900_AT, 239851_AT, 238034_AT, 216450_X_AT, 217939_S_AT,…	2456	568	12782	1.17282	1	0.245051	37.254
GOTERM_CC_FAT	GO:0005783~endoplasmic reticulum	208	5.17542	0.0317416	212221_X_AT, 222824_AT, 232530_AT, 237849_AT, 203584_AT, 241801_AT, 203485_AT, 201133_S_AT, 226422_AT, 229506_AT, 205584_AT, 223466_X_AT, 234988_AT, 221604_S_AT, 242323_AT, 235957_AT, 229958_AT, 217550_AT, 209748_AT, 242037_AT, 203164_AT, 220576_AT, 228391_AT, 222692_S_AT, 218135_AT, 228457_AT, 223470_AT, 223243_S_AT, 225008_AT, 228573_AT, 216450_X_AT, 226625_AT, 202829_S_AT, 212305_S_AT, 202620_…	2456	960	12782	1.12762	1	0.252859	38.6978
GOTERM_CC_FAT	GO:0016023~cytoplasmic membrane-bounded vesicle	124	3.08534	0.0322798	218962_S_AT, 229549_AT, 203504_S_AT, 212425_AT, 241775_AT, 202604_X_AT, 232058_AT, 222394_AT, 225023_AT, 218079_S_AT, 225022_AT, 226094_AT, 232914_S_AT, 202161_AT, 228323_AT, 226932_AT, 210849_S_AT, 244753_AT, 200784_S_AT, 203446_S_AT, 200599_S_AT, 235957_AT, 229672_AT, 204324_S_AT, 232098_AT, 204426_AT, 239179_AT, 212253_X_AT, 206254_AT, 212900_AT, 239851_AT, 238034_AT, 216450_X_AT, 217939_S_AT,…	2456	550	12782	1.17336	1	0.253911	39.2128
GOTERM_CC_FAT	GO:0000784~nuclear chromosome, telomeric region	9	0.223936	0.0345042	222562_S_AT, 229167_AT, 235215_AT, 202561_AT, 204021_S_AT, 217299_S_AT, 204353_S_AT, 238656_AT, 204020_AT, 202906_S_AT, 203449_S_AT, 238108_AT, 229790_AT, 204354_AT, 218228_S_AT, 202907_S_AT, 202905_X_AT, 233152_X_AT, 208393_S_AT	2456	21	12782	2.23046	1	0.266316	41.2983
GOTERM_CC_FAT	GO:0043198~dendritic shaft	7	0.174173	0.036546	207135_AT, 226191_AT, 242558_AT, 225540_AT, 202395_AT, 239264_AT, 1554411_AT, 226183_AT, 211616_S_AT, 225491_AT	2456	14	12782	2.6022	1	0.277066	43.1537
GOTERM_CC_FAT	GO:0044448~cell cortex part	24	0.597163	0.037615	212698_S_AT, 214925_S_AT, 201616_S_AT, 1559776_AT, 232058_AT, 1559038_AT, 212026_S_AT, 209677_AT, 215198_S_AT, 225093_AT, 204967_AT, 235834_AT, 212752_AT, 201615_X_AT, 214720_X_AT, 213151_S_AT, 200015_S_AT, 244753_AT, 205525_AT, 201718_S_AT, 212077_AT, 209678_S_AT, 243813_AT, 201719_S_AT, 222127_S_AT, 225900_AT, 200672_X_AT, 1558041_A_AT, 1554747_A_AT, 239264_AT, 1569202_X_AT, 1552619_A_AT, 24206…	2456	83	12782	1.50489	1	0.281206	44.1031
GOTERM_CC_FAT	GO:0030133~transport vesicle	20	0.497636	0.0387368	218962_S_AT, 204964_S_AT, 222294_S_AT, 225023_AT, 225022_AT, 209515_S_AT, 236862_AT, 64418_AT, 239175_AT, 232914_S_AT, 1556416_S_AT, 225556_AT, 222472_AT, 225871_AT, 226932_AT, 228415_AT, 232405_AT, 214356_S_AT, 201392_S_AT, 235766_X_AT, 236368_AT, 212043_AT, 232981_S_AT, 225496_S_AT, 222715_S_AT, 200614_AT, 234998_AT, 212900_AT, 227215_AT, 215209_AT, 212427_AT, 205198_S_AT, 234726_S_AT, 215641_A…	2456	66	12782	1.57709	1	0.285569	45.0834
GOTERM_CC_FAT	GO:0005884~actin filament	14	0.348345	0.0388319	209209_S_AT, 201616_S_AT, 239170_AT, 210840_S_AT, 212119_AT, 212122_AT, 202663_AT, 212663_AT, 215198_S_AT, 204967_AT, 238688_AT, 235834_AT, 201615_X_AT, 212117_AT, 203215_S_AT, 205525_AT, 239258_AT, 213102_AT, 212077_AT, 1559582_AT, 200791_S_AT, 209390_AT, 228603_AT, 242742_AT, 212120_AT, 201617_X_AT, 214212_X_AT, 203216_S_AT, 203593_AT, 214880_X_AT, 214449_S_AT, 213446_S_AT, 202664_AT, 200996_AT…	2456	41	12782	1.77711	1	0.283399	45.1658
GOTERM_CC_FAT	GO:0012506~vesicle membrane	39	0.970391	0.0419788	212425_AT, 200821_AT, 239329_AT, 201734_AT, 201735_S_AT, 209515_S_AT, 201278_AT, 240237_AT, 217999_S_AT, 212417_AT, 213500_AT, 203215_S_AT, 235766_X_AT, 232136_S_AT, 203196_AT, 232925_AT, 204426_AT, 241611_S_AT, 239179_AT, 225878_AT, 209234_AT, 227103_S_AT, 200614_AT, 212900_AT, 203216_S_AT, 239851_AT, 215209_AT, 215910_S_AT, 211323_S_AT, 210616_S_AT, 217939_S_AT, 221937_AT, 202798_AT, 202829_S_A…	2456	151	12782	1.34418	1	0.300037	47.8271
GOTERM_CC_FAT	GO:0000152~nuclear ubiquitin ligase complex	8	0.199054	0.0420569	231913_S_AT, 235926_AT, 227545_AT, 201959_S_AT, 226917_S_AT, 217902_S_AT, 229436_X_AT, 216521_S_AT, 211865_S_AT, 201960_S_AT, 1557370_S_AT, 212601_AT, 232524_X_AT, 221196_X_AT	2456	18	12782	2.31307	1	0.297697	47.8916
GOTERM_CC_FAT	GO:0030134~ER to Golgi transport vesicle	6	0.149291	0.0430294	215209_AT, 212427_AT, 1556416_S_AT, 225556_AT, 215641_AT, 210616_S_AT, 212428_AT, 232405_AT, 214356_S_AT, 202798_AT, 236368_AT, 212900_AT	2456	11	12782	2.83876	1	0.300735	48.6884
GOTERM_CC_FAT	GO:0000123~histone acetyltransferase complex	16	0.398109	0.0443949	213579_S_AT, 218517_AT, 212375_AT, 212462_AT, 201459_AT, 226547_AT, 228483_S_AT, 226776_AT, 203845_AT, 221616_S_AT, 1554721_A_AT, 234969_S_AT, 201836_S_AT, 202160_AT, 1559946_S_AT, 223875_S_AT, 228287_AT, 202221_S_AT, 225820_AT, 226037_S_AT, 202642_S_AT, 202423_AT, 228177_AT, 201838_S_AT, 209523_AT, 208202_S_AT, 225816_AT	2456	50	12782	1.66541	1	0.305998	49.788
GOTERM_CC_FAT	GO:0030120~vesicle coat	13	0.323464	0.0474914	31799_AT, 232541_AT, 228164_AT, 64418_AT, 239175_AT, 213500_AT, 1556416_S_AT, 225556_AT, 201359_AT, 222472_AT, 228415_AT, 232405_AT, 224999_AT, 232981_S_AT, 232925_AT, 222715_S_AT, 200614_AT, 212900_AT, 215209_AT, 201358_S_AT, 201983_S_AT, 215641_AT, 210616_S_AT, 217939_S_AT, 221937_AT, 202798_AT	2456	38	12782	1.78045	1	0.321	52.2005
GOTERM_CC_FAT	GO:0005789~endoplasmic reticulum membrane	64	1.59244	0.0475467	222824_AT, 202435_S_AT, 202516_S_AT, 244457_AT, 241801_AT, 203485_AT, 229648_AT, 227639_AT, 229506_AT, 229850_AT, 202514_AT, 223466_X_AT, 232101_S_AT, 221604_S_AT, 232324_X_AT, 209976_S_AT, 200599_S_AT, 217550_AT, 203769_S_AT, 230229_AT, 242037_AT, 222689_AT, 220576_AT, 212226_S_AT, 203164_AT, 227776_AT, 225750_AT, 205281_S_AT, 228457_AT, 212900_AT, 223470_AT, 225008_AT, 216450_X_AT, 207284_S_AT,…	2456	269	12782	1.23822	1	0.318479	52.2425
GOTERM_CC_FAT	GO:0012507~ER to Golgi transport vesicle membrane	5	0.124409	0.0492354	215209_AT, 1556416_S_AT, 225556_AT, 215641_AT, 210616_S_AT, 232405_AT, 202798_AT, 212900_AT	2456	8	12782	3.25275	1	0.325085	53.5111
GOTERM_CC_FAT	GO:0030127~COPII vesicle coat	5	0.124409	0.0492354	215209_AT, 1556416_S_AT, 225556_AT, 215641_AT, 210616_S_AT, 232405_AT, 202798_AT, 212900_AT	2456	8	12782	3.25275	1	0.325085	53.5111
GOTERM_CC_FAT	GO:0042175~nuclear envelope-endoplasmic reticulum network	67	1.66708	0.0500161	222824_AT, 202435_S_AT, 202516_S_AT, 244457_AT, 241801_AT, 203485_AT, 229648_AT, 227639_AT, 229506_AT, 229850_AT, 202514_AT, 223466_X_AT, 232101_S_AT, 221604_S_AT, 232324_X_AT, 209976_S_AT, 200599_S_AT, 217550_AT, 203769_S_AT, 230229_AT, 242037_AT, 222689_AT, 220576_AT, 212226_S_AT, 203164_AT, 227776_AT, 225750_AT, 205281_S_AT, 228457_AT, 212900_AT, 223470_AT, 225008_AT, 216450_X_AT, 207284_S_AT,…	2456	284	12782	1.2278	1	0.326562	54.0869
GOTERM_CC_FAT	GO:0030427~site of polarized growth	17	0.422991	0.0502709	214577_AT, 210251_S_AT, 213437_AT, 212233_AT, 226186_AT, 227240_AT, 212985_AT, 241966_AT, 227761_AT, 226183_AT, 200813_S_AT, 213430_AT, 200816_S_AT, 226191_AT, 202508_S_AT, 209677_AT, 212663_AT, 225093_AT, 203526_S_AT, 209028_S_AT, 227802_AT, 203724_S_AT, 226084_AT, 213939_S_AT, 212970_AT, 238563_AT, 209678_S_AT, 242611_AT, 229334_AT, 209390_AT, 239264_AT, 225384_AT, 213518_AT, 204527_AT, 203525_…	2456	55	12782	1.60863	1	0.325164	54.2734
GOTERM_CC_FAT	GO:0031461~cullin-RING ubiquitin ligase complex	7	0.174173	0.0512677	242194_AT, 203533_S_AT, 201371_S_AT, 225192_AT, 201370_S_AT, 203078_AT, 210257_X_AT, 227257_S_AT, 203079_S_AT, 240971_X_AT, 203531_AT, 243286_AT, 232466_AT, 242362_AT, 202214_S_AT, 202213_S_AT	2456	15	12782	2.42872	1	0.327771	54.9961
GOTERM_CC_FAT	GO:0031941~filamentous actin	7	0.174173	0.0512677	203216_S_AT, 203593_AT, 209209_S_AT, 204967_AT, 238688_AT, 242742_AT, 203215_S_AT, 60474_AT, 214212_X_AT, 209210_S_AT	2456	15	12782	2.42872	1	0.327771	54.9961
GOTERM_CC_FAT	GO:0030056~hemidesmosome	4	0.0995272	0.0519736	212254_S_AT, 217941_S_AT, 222473_S_AT, 239170_AT, 232098_AT, 228603_AT, 207358_X_AT, 212253_X_AT, 208634_S_AT, 215016_X_AT, 214894_X_AT, 208633_S_AT, 215222_X_AT, 200996_AT, 213102_AT	2456	5	12782	4.16352	1	0.328783	55.5014
GOTERM_CC_FAT	GO:0005828~kinetochore microtubule	4	0.0995272	0.0519736	221258_S_AT, 212309_AT, 212306_AT, 206316_S_AT, 212752_AT	2456	5	12782	4.16352	1	0.328783	55.5014
GOTERM_CC_FAT	GO:0044454~nuclear chromosome part	32	0.796218	0.0548615	229167_AT, 225120_AT, 237333_AT, 209258_S_AT, 202561_AT, 208861_S_AT, 208859_S_AT, 230165_AT, 204354_AT, 209902_AT, 202905_X_AT, 208393_S_AT, 225396_AT, 209257_S_AT, 226840_AT, 212126_AT, 235425_AT, 213140_S_AT, 225135_AT, 235423_AT, 226085_AT, 238108_AT, 213301_X_AT, 204391_X_AT, 208860_S_AT, 218228_S_AT, 1555920_AT, 202076_AT, 202907_S_AT, 218242_S_AT, 238005_S_AT, 224974_AT, 222562_S_AT, 22280…	2456	122	12782	1.36509	1	0.341107	57.514
GOTERM_CC_FAT	GO:0044438~microbody part	14	0.348345	0.0555587	202850_AT, 201432_AT, 204873_AT, 204573_AT, 221834_AT, 224866_AT, 242708_AT, 223982_S_AT, 225108_AT, 235093_AT, 227962_AT, 1558014_S_AT, 239001_AT, 203027_S_AT, 217496_S_AT, 225113_AT, 223310_X_AT, 203327_AT, 221604_S_AT, 224865_AT, 221833_AT, 211922_S_AT, 223309_X_AT	2456	43	12782	1.69445	1	0.341917	57.987
GOTERM_CC_FAT	GO:0044439~peroxisomal part	14	0.348345	0.0555587	202850_AT, 201432_AT, 204873_AT, 204573_AT, 221834_AT, 224866_AT, 242708_AT, 223982_S_AT, 225108_AT, 235093_AT, 227962_AT, 1558014_S_AT, 239001_AT, 203027_S_AT, 217496_S_AT, 225113_AT, 223310_X_AT, 203327_AT, 221604_S_AT, 224865_AT, 221833_AT, 211922_S_AT, 223309_X_AT	2456	43	12782	1.69445	1	0.341917	57.987
GOTERM_CC_FAT	GO:0031965~nuclear membrane	21	0.522518	0.0557091	214363_S_AT, 227798_AT, 219028_AT, 202561_AT, 1564064_A_AT, 243013_AT, 229838_AT, 202761_S_AT, 212536_AT, 200813_S_AT, 200816_S_AT, 234969_S_AT, 210993_S_AT, 211971_S_AT, 213411_AT, 225968_AT, 200037_S_AT, 1558093_S_AT, 230998_AT, 1558783_AT, 203215_S_AT, 244219_AT, 1560274_AT, 223875_S_AT, 228012_AT, 230194_AT, 212248_AT, 216944_S_AT, 206487_AT, 204538_X_AT, 225116_AT, 204273_AT, 200624_S_AT, 20…	2456	73	12782	1.49716	1	0.339947	58.0884
GOTERM_CC_FAT	GO:0055037~recycling endosome	9	0.223936	0.0582168	206668_S_AT, 225064_AT, 224788_AT, 212425_AT, 227791_AT, 203909_AT, 218310_AT, 203124_S_AT, 234998_AT, 225092_AT, 212417_AT, 228613_AT, 203123_S_AT, 203223_AT, 212416_AT	2456	23	12782	2.0365	1	0.349781	59.7456
GOTERM_CC_FAT	GO:0000932~cytoplasmic mRNA processing body	9	0.223936	0.0582168	229841_AT, 228998_AT, 238468_AT, 229036_AT, 212919_AT, 237895_AT, 225468_AT, 1558142_AT, 213254_AT, 224705_S_AT, 225466_AT, 230779_AT, 227930_AT, 217779_S_AT, 222406_S_AT, 234734_S_AT, 225549_AT, 228120_AT, 224704_AT, 225569_AT	2456	23	12782	2.0365	1	0.349781	59.7456
GOTERM_CC_FAT	GO:0031253~cell projection membrane	19	0.472754	0.0612197	226125_AT, 235007_AT, 240485_AT, 210040_AT, 213194_AT, 1554411_AT, 232459_AT, 217653_X_AT, 203526_S_AT, 1558714_AT, 224694_AT, 242558_AT, 238688_AT, 212828_AT, 203215_S_AT, 224761_AT, 219688_AT, 37549_G_AT, 205746_S_AT, 225491_AT, 210612_S_AT, 203216_S_AT, 1553678_A_AT, 209958_S_AT, 203525_S_AT, 222453_AT, 213532_AT, 207621_S_AT, 1553530_A_AT	2456	65	12782	1.52129	1	0.36171	61.6494
GOTERM_CC_FAT	GO:0000242~pericentriolar material	6	0.149291	0.0623934	222562_S_AT, 210962_S_AT, 202561_AT, 234984_AT, 218827_S_AT, 238108_AT, 1552417_A_AT, 214118_X_AT, 1560116_A_AT, 218228_S_AT, 202174_S_AT, 228905_AT, 214937_X_AT, 233152_X_AT	2456	12	12782	2.6022	1	0.364569	62.3703
GOTERM_CC_FAT	GO:0005583~fibrillar collagen	6	0.149291	0.0623934	202311_S_AT, 225293_AT, 229218_AT, 212489_AT, 202404_S_AT, 201852_X_AT, 212488_AT, 202310_S_AT, 225288_AT, 221730_AT, 221729_AT, 1556499_S_AT, 215076_S_AT	2456	12	12782	2.6022	1	0.364569	62.3703
GOTERM_CC_FAT	GO:0044432~endoplasmic reticulum part	79	1.96566	0.0688646	229549_AT, 222824_AT, 202435_S_AT, 202516_S_AT, 244457_AT, 235311_AT, 241801_AT, 203485_AT, 229648_AT, 227639_AT, 229506_AT, 229850_AT, 202514_AT, 223466_X_AT, 222569_AT, 232101_S_AT, 221604_S_AT, 232324_X_AT, 209976_S_AT, 200599_S_AT, 217550_AT, 203769_S_AT, 230229_AT, 242037_AT, 222689_AT, 203164_AT, 212226_S_AT, 220576_AT, 227776_AT, 225750_AT, 205281_S_AT, 228457_AT, 212900_AT, 219102_AT, 223…	2456	347	12782	1.18486	1	0.3919	66.1235
GOTERM_CC_FAT	GO:0030140~trans-Golgi network transport vesicle	9	0.223936	0.0731602	212043_AT, 232981_S_AT, 222715_S_AT, 225023_AT, 225022_AT, 200614_AT, 236862_AT, 64418_AT, 227215_AT, 239175_AT, 205198_S_AT, 225871_AT, 222472_AT, 217939_S_AT, 228415_AT, 221937_AT, 201392_S_AT, 212040_AT	2456	24	12782	1.95165	1	0.40824	68.4184
GOTERM_CC_FAT	GO:0014069~postsynaptic density	20	0.497636	0.0748544	212777_AT, 214577_AT, 214848_AT, 201616_S_AT, 212233_AT, 202604_X_AT, 202516_S_AT, 225023_AT, 225022_AT, 201133_S_AT, 229648_AT, 202514_AT, 215198_S_AT, 235834_AT, 201615_X_AT, 212780_AT, 1558501_AT, 212077_AT, 236388_AT, 230229_AT, 225308_S_AT, 201617_X_AT, 211323_S_AT, 230734_X_AT, 205893_AT, 202609_AT, 227422_AT, 217208_S_AT, 236862_AT, 1556097_AT, 218613_AT, 230337_AT, 226291_AT, 226084_AT, 2…	2456	71	12782	1.46603	1	0.412728	69.283
GOTERM_CC_FAT	GO:0000940~outer kinetochore of condensed chromosome	5	0.124409	0.0754544	221685_S_AT, 225686_AT, 209172_S_AT, 205046_AT, 228177_AT, 207828_S_AT, 202160_AT	2456	9	12782	2.89133	1	0.412416	69.5839
GOTERM_CC_FAT	GO:0001726~ruffle	19	0.472754	0.0788305	224788_AT, 228173_AT, 212397_AT, 241154_X_AT, 202677_AT, 241966_AT, 227761_AT, 1565886_AT, 210621_S_AT, 232344_AT, 218368_S_AT, 223324_S_AT, 242975_S_AT, 221258_S_AT, 239484_AT, 226291_AT, 237884_X_AT, 229274_AT, 212828_AT, 238688_AT, 203215_S_AT, 214782_AT, 205746_S_AT, 242742_AT, 203037_S_AT, 210612_S_AT, 201059_AT, 224848_AT, 203216_S_AT, 1553678_A_AT, 224851_AT, 203593_AT, 204527_AT, 213532_A…	2456	67	12782	1.47587	1	0.423872	71.226
GOTERM_CC_FAT	GO:0005739~mitochondrion	228	5.67305	0.0795971	218893_AT, 204142_AT, 203159_AT, 217317_S_AT, 207622_S_AT, 222269_AT, 201919_AT, 218046_S_AT, 236545_AT, 202080_S_AT, 223466_X_AT, 222672_AT, 204947_AT, 231919_AT, 209976_S_AT, 211801_X_AT, 223743_S_AT, 226606_S_AT, 210852_S_AT, 202457_S_AT, 236007_AT, 238554_AT, 210008_S_AT, 228020_AT, 203524_S_AT, 231094_S_AT, 218456_AT, 213840_S_AT, 203931_S_AT, 203711_S_AT, 242645_AT, 224655_AT, 217368_AT, 23…	2456	1087	12782	1.09163	1	0.424176	71.5871
GOTERM_CC_FAT	GO:0000118~histone deacetylase complex	13	0.323464	0.0797559	200854_AT, 225396_AT, 237333_AT, 218218_AT, 223013_AT, 212126_AT, 225135_AT, 222634_S_AT, 218158_S_AT, 240314_AT, 213435_AT, 202599_S_AT, 209571_AT, 226085_AT, 239071_AT, 1554153_A_AT, 222633_AT, 200857_S_AT, 222538_S_AT, 202600_S_AT, 221428_S_AT, 227679_AT, 238005_S_AT, 224974_AT	2456	41	12782	1.65017	1	0.421964	71.6614
GOTERM_CC_FAT	GO:0030426~growth cone	16	0.398109	0.0806875	214577_AT, 210251_S_AT, 213437_AT, 212233_AT, 226186_AT, 227240_AT, 212985_AT, 241966_AT, 227761_AT, 226183_AT, 200813_S_AT, 200816_S_AT, 213430_AT, 226191_AT, 202508_S_AT, 212663_AT, 225093_AT, 203526_S_AT, 209028_S_AT, 203724_S_AT, 227802_AT, 226084_AT, 212970_AT, 213939_S_AT, 238563_AT, 242611_AT, 229334_AT, 209390_AT, 239264_AT, 225384_AT, 204527_AT, 203525_S_AT, 1556629_A_AT, 202507_S_AT	2456	54	12782	1.54204	1	0.42296	72.0935
GOTERM_CC_FAT	GO:0019867~outer membrane	28	0.696691	0.0820247	220076_AT, 201662_S_AT, 229838_AT, 200662_S_AT, 202264_S_AT, 226528_AT, 210069_AT, 213326_AT, 227314_AT, 211971_S_AT, 217043_S_AT, 223092_AT, 223093_AT, 229321_S_AT, 211801_X_AT, 222148_S_AT, 238119_AT, 205032_AT, 210070_S_AT, 230194_AT, 242726_AT, 202422_S_AT, 207098_S_AT, 218323_AT, 214306_AT, 201661_S_AT, 227274_AT, 235722_AT, 239001_AT, 211615_S_AT, 224461_S_AT, 238554_AT, 212214_AT, 209090_S…	2456	108	12782	1.34929	1	0.425588	72.703
GOTERM_CC_FAT	GO:0043296~apical junction complex	26	0.646927	0.0831776	226834_AT, 212037_AT, 218087_S_AT, 226092_AT, 241970_AT, 227422_AT, 243184_AT, 244476_AT, 1554411_AT, 222667_S_AT, 202011_AT, 219321_AT, 203526_S_AT, 202085_AT, 204967_AT, 242558_AT, 232859_S_AT, 203917_AT, 225474_AT, 1567214_A_AT, 226770_AT, 236388_AT, 236752_AT, 214168_S_AT, 226374_AT, 226447_AT, 203407_AT, 212248_AT, 32402_S_AT, 225817_AT, 219760_AT, 232017_AT, 241957_X_AT, 228411_AT, 223350_X…	2456	99	12782	1.36681	1	0.427426	73.2185
GOTERM_CC_FAT	GO:0005741~mitochondrial outer membrane	24	0.597163	0.0840031	201662_S_AT, 200662_S_AT, 202264_S_AT, 226528_AT, 210069_AT, 213326_AT, 217043_S_AT, 229321_S_AT, 238119_AT, 222148_S_AT, 211801_X_AT, 210070_S_AT, 242726_AT, 202422_S_AT, 207098_S_AT, 214306_AT, 218323_AT, 201661_S_AT, 227274_AT, 239001_AT, 235722_AT, 212214_AT, 238554_AT, 224461_S_AT, 209090_S_AT, 200726_AT, 203728_AT, 1557675_AT, 226154_AT, 201667_AT, 212213_X_AT, 207686_S_AT, 201660_AT, 23616…	2456	90	12782	1.38784	1	0.427933	73.582
GOTERM_CC_FAT	GO:0030684~preribosome	6	0.149291	0.0858667	218758_S_AT, 209820_S_AT, 203614_AT, 212563_AT, 207686_S_AT, 226180_AT, 216397_S_AT	2456	13	12782	2.40203	1	0.432512	74.3857
GOTERM_CC_FAT	GO:0045120~pronucleus	6	0.149291	0.0858667	236620_AT, 221860_AT, 214700_X_AT, 215006_AT, 209172_S_AT, 203358_S_AT, 238656_AT, 207828_S_AT, 205733_AT, 226503_AT, 208393_S_AT, 226821_AT	2456	13	12782	2.40203	1	0.432512	74.3857
GOTERM_CC_FAT	GO:0030131~clathrin adaptor complex	10	0.248818	0.0882914	222516_AT, 224999_AT, 235852_AT, 232156_AT, 222531_S_AT, 232981_S_AT, 213413_AT, 232925_AT, 232541_AT, 218139_S_AT, 222715_S_AT, 225771_AT, 64418_AT, 239175_AT, 201983_S_AT, 200612_S_AT, 227461_AT, 222472_AT, 217939_S_AT, 228415_AT, 221937_AT	2456	29	12782	1.79462	1	0.439155	75.3973
GOTERM_CC_FAT	GO:0042827~platelet dense granule	4	0.0995272	0.0893276	226671_AT, 205463_S_AT, 200821_AT, 203196_AT, 211323_S_AT, 216944_S_AT, 229830_AT, 203041_S_AT	2456	6	12782	3.4696	1	0.440361	75.8181
GOTERM_CC_FAT	GO:0005721~centromeric heterochromatin	4	0.0995272	0.0893276	227350_AT, 226085_AT, 212126_AT, 1555920_AT, 200037_S_AT, 208445_S_AT, 230998_AT, 213336_AT	2456	6	12782	3.4696	1	0.440361	75.8181
GOTERM_CC_FAT	GO:0005899~insulin receptor complex	3	0.0746454	0.0964761	235392_AT, 218087_S_AT, 242979_AT, 204686_AT, 226450_AT, 238933_AT	2456	3	12782	5.2044	1	0.464236	78.5431
GOTERM_CC_FAT	GO:0031088~platelet dense granule membrane	3	0.0746454	0.0964761	226671_AT, 200821_AT, 203196_AT, 211323_S_AT, 216944_S_AT, 203041_S_AT	2456	3	12782	5.2044	1	0.464236	78.5431
GOTERM_CC_FAT	GO:0034747~Axin-APC-beta-catenin-GSK3B complex	3	0.0746454	0.0964761	226191_AT, 203526_S_AT, 242558_AT, 203525_S_AT, 1554411_AT, 226183_AT	2456	3	12782	5.2044	1	0.464236	78.5431
GOTERM_CC_FAT	GO:0042382~paraspeckles	3	0.0746454	0.0964761	238913_AT, 218371_S_AT, 238651_AT, 224830_AT, 226934_AT	2456	3	12782	5.2044	1	0.464236	78.5431
GOTERM_CC_FAT	GO:0005911~cell-cell junction	45	1.11968	0.0986771	212037_AT, 218087_S_AT, 226092_AT, 202516_S_AT, 244476_AT, 243184_AT, 203018_S_AT, 225098_AT, 202011_AT, 219321_AT, 228563_AT, 203017_S_AT, 202514_AT, 202085_AT, 242558_AT, 232859_S_AT, 224685_AT, 1567214_A_AT, 203019_X_AT, 226770_AT, 236388_AT, 214168_S_AT, 230229_AT, 203329_AT, 203016_S_AT, 228411_AT, 203794_AT, 223350_X_AT, 203038_AT, 229127_AT, 214464_AT, 230734_X_AT, 228480_AT, 213532_AT, 22…	2456	190	12782	1.23262	1	0.469396	79.3225
